# Supplementary material for: A hybrid wavelength selection strategy-based quantitative analysis model for LIBS data from standard ground samples of the Curiosity rover on Mars
Source: Royal Society of Chemistry journal article supplement (doi:10.1039/d2ja00216g), 2022-01-01
Supplement: d2ja00216g1.pdf [file d2ja00216g1.pdf]

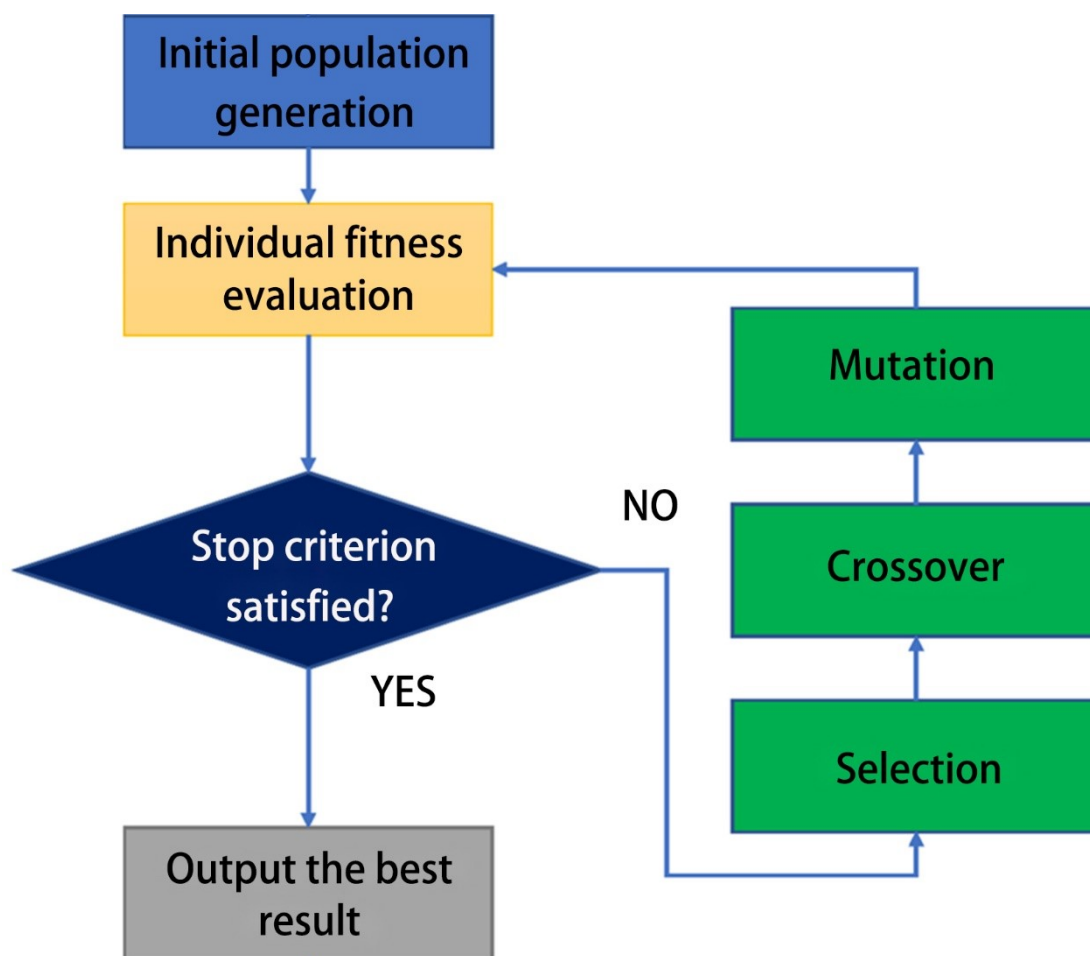

Figure S1. The main procedure of GA.

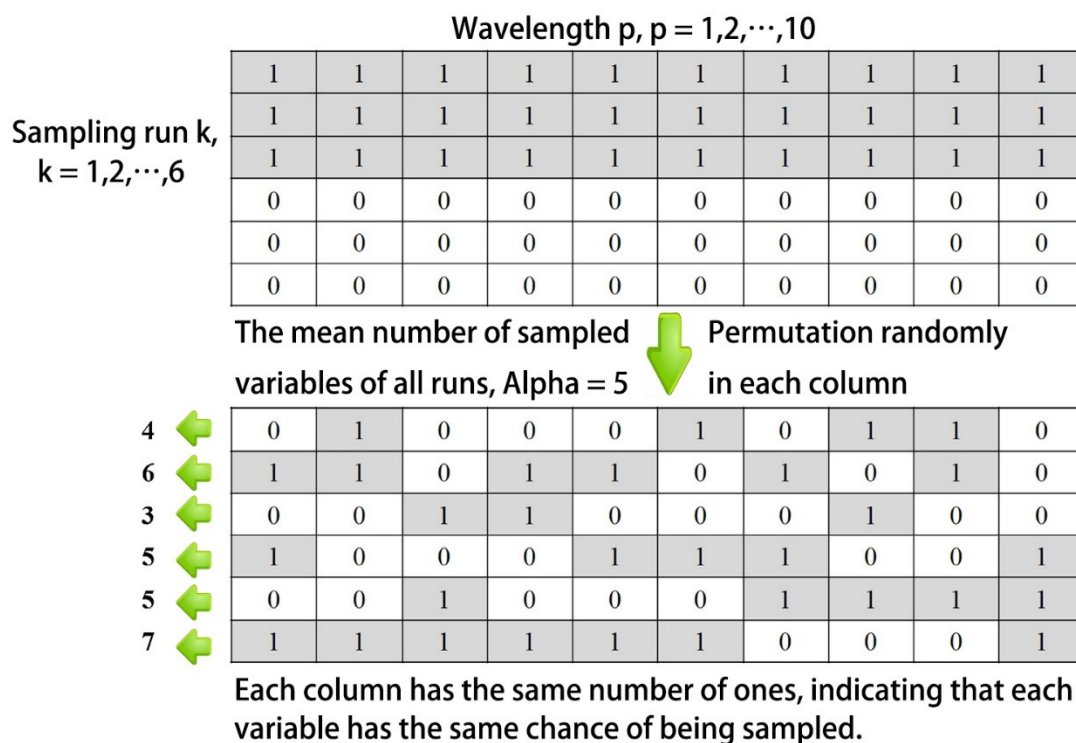

Figure S2. An example of the BMS approach.

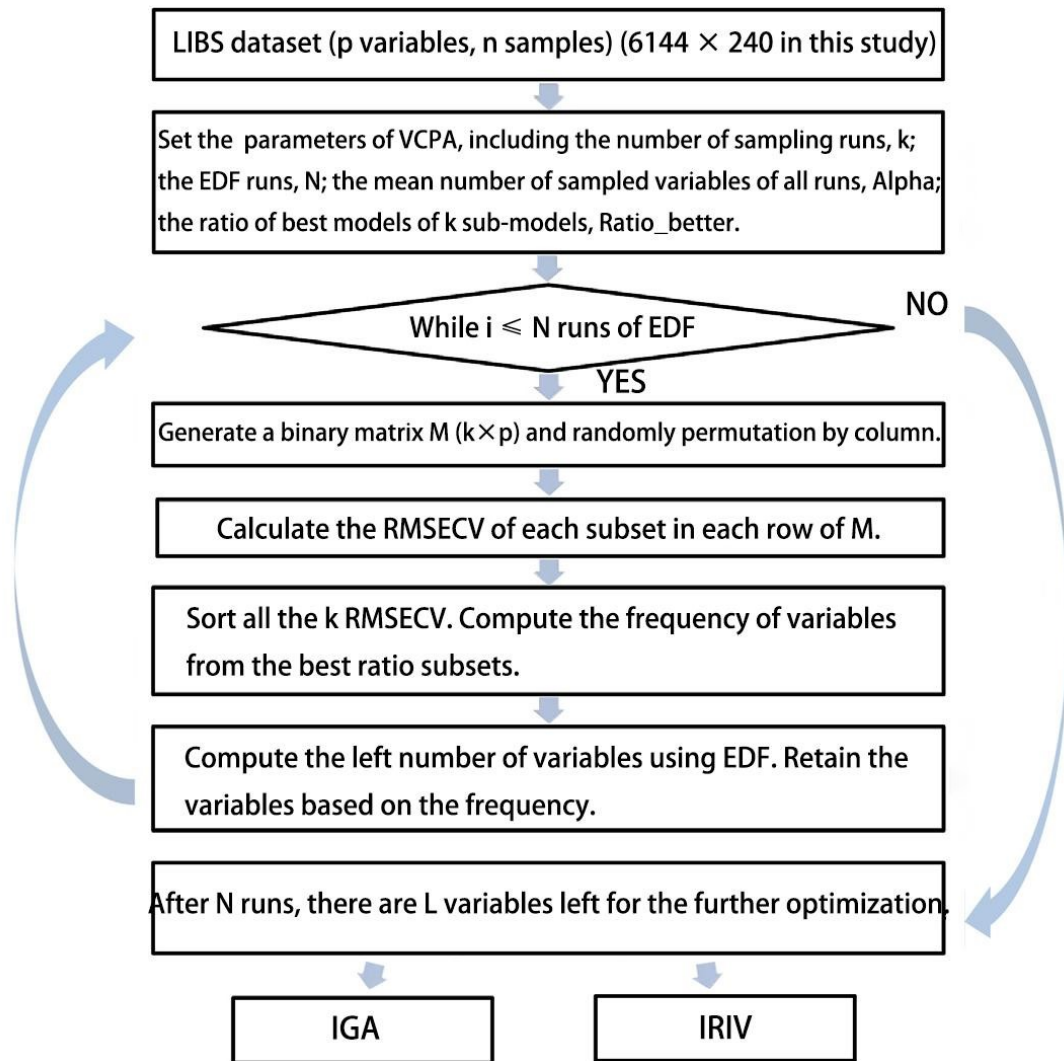

Figure S3. Flow chart of VCPA.
